## Formation of ultralong DH regions through genomic rearrangement

Brevin A. Smider<sup>1</sup> and Vaughn V. Smider<sup>1, 2</sup>

<sup>1</sup>The Applied Biomedical Science Institute, San Diego, CA 92127

<sup>2</sup>The Scripps Research Institute, La Jolla, CA 92037

Correspondence: [vvsמידer@scripps.edu](mailto:vvsמידer@scripps.edu)

### Abstract

Cow antibodies are very unusual in having exceptionally long CDR H3 regions. The genetic basis for this length largely derives from long heavy chain diversity (DH) regions, with a single “ultralong” DH, IGHD8-2, encoding over fifty amino acids. Most bovine IGHD regions are homologous but have several nucleotide repeating units that diversify their lengths. Genomically, most DH regions exist in three clusters that appear to have formed from DNA duplication events. The cluster containing IGHD8-2 underwent a rearrangement and deletion event in relation to the other clusters in the region corresponding to IGHD8-2, with possible fusion of two DH regions and expansion of short repeats to form the ultralong IGHD8-2 gene. Length heterogeneity within DH regions is a unique evolutionary genomic mechanism to create immune diversity, including formation of ultralong CDR H3 regions.

### Introduction

Adaptive immunity arose in vertebrates through the ability to somatically alter antigen receptor (antibody and T-cell receptor) genes to form diverse repertoires which are selected to bind and neutralize invading pathogens. A key component of this system is the ability to perform recombination of variable (V), diversity (D), and joining (J) gene segments through the process of V(D)J recombination[1-3]. A diversity of V, D, and J elements, along with imprecise joining at the V-D and D-J junctions enables different amino acids to be encoded in key paratopic regions which impact antigen binding.

The third complementary determining region of the heavy chain (CDR H3) is particularly important in antibody molecules as it contains the greatest diversity and also usually makes the most extensive contact with antigen. Long CDR H3 regions are often found in broadly neutralizing antibodies targeting human immunodeficiency (HIV), influenza, and polio viruses[4-8], and are also thought to be important in binding challenging antigens like G-protein coupled receptors and protease active sites[9, 10]. Thus, genetic mechanisms to form long CDR H3s may be very important in immune responses against key antigens.

In most organisms, the antibody CDR H3 forms a loop of 10-15 amino acids in length, and is encoded by the DH gene and associated recombinational junctions that form through VDJ recombination. Unusually

37 long CDR H3s, such as those in broadly neutralizing anti-HIV antibodies, are often over 20 amino acids in  
38 length [4, 11-13]. The major determinants of CDR H3 length are the length of the germline encoded DH  
39 region, as well as somatic insertion of nucleotides (*e.g.* N- or P- nucleotides) at the V-D and D-J junctions.  
40 In humans, the longest DH region, IGHD3-16, encodes 12 amino acids.

41 Bovines are remarkable in having very long CDR H3 regions[14-24], with an average length of 26 amino  
42 acids [16]but with an exceptionally long subset of the repertoire (the “ultralong” CDR H3 antibodies)  
43 that can have CDR H3 lengths of up to seventy amino acids. These CDR H3 regions form their own  
44 independently folding mini domains comprised of a  $\beta$ -ribbon “stalk” that protrudes far from the typical  
45 paratope surface upon which sits a disulfide-bonded “knob”[21, 23, 25, 26]. Cows are the only species  
46 thus far investigated that can produce a broadly neutralizing antibody response against HIV, which is  
47 characterized by ultralong CDR H3 regions that penetrate the glycan shield of the spike protein to bind a  
48 conserved broadly neutralizing epitope in the CD4 binding region [27]. Cows are therefore unusual in  
49 producing long CDR H3s, and this unique repertoire has major functional relevance in neutralizing an  
50 antigen that is extremely challenging for repertoires of other mammalian species. Therefore,  
51 understanding the natural genetic and evolutionary mechanisms behind ultralong CDR H3 generation  
52 would be important in vaccine generation as well as therapeutic antibody discovery and development.

53 At least two evolutionary genetic events occurred which enabled formation of ultralong CDR H3  
54 antibodies in cows. First, a unique VH region evolved as a result of an 8-basepair duplication at the 3’  
55 end of IGHV1-7[16]. This particular variable region is the only VH region used in ultralong CDR H3  
56 antibodies, and the short duplication directly encodes the ascending strand of the stalk region  
57 characteristic of these antibodies. Second, a very long DH region is found in cattle, IGHD8-2, which  
58 encodes 49 amino acids[23, 28-30]. Antibodies with ultralong CDR H3 regions invariably use IGHV1-7  
59 and IGHD8-2[8, 16]. Here we examine the genetic features at work in the evolution of this unusually  
60 long DH region of cattle.

## 61 **Results**

### 62 *DH cluster 2 has a significant deletion*

63 We analyzed the DH regions of the recent assembly of the *Bos taurus* immunoglobulin heavy chain locus  
64 [29]for features associated with the ultralong IGHD8-2 region. Of particular note, the DH regions at the  
65 heavy chain locus are divided into “clusters” that arose from duplication events through evolution. The  
66 IMGT naming nomenclature for DH regions includes numerical designations for the family and cluster of  
67 each gene; for example, IGHD3-2 is in family 3 and located in cluster 2 [16, 31-33]. There are four  
68 clusters, with clusters 2-4 being highly homologous with nucleotide identities of 92% (cluster 2 vs cluster  
69 3), 99.7% (cluster 3 vs cluster 4), and 92% (cluster 2 vs cluster 4). The sequences of the DH regions  
70 located within the clusters are also highly homologous, with DH regions occupying analogous locations  
71 being 96% to 100% identical at the nucleotide level (Supplemental Figure 1). A major discrepancy in the  
72 cluster sequences, however, is that cluster 2 (3480 nucleotides) is 358 and 364 nucleotides shorter than  
73 clusters 3 (3838 nt) and 4 (3844 nt), respectfully. Additionally, cluster 2 is comprised of only five DH  
74 regions, with one of them being the ultralong IGHD8-2, whereas clusters 3 and 4 are comprised of six  
75 DH regions (Figure 1). Thus, cluster 2 appears to have a significant genomic deletion in relation to the  
76 highly homologous clusters 3 and 4. We hypothesized that this deletion might be related to formation  
77 of the ultralong IGHD8-2 region located in cluster 2. In simplistic terms, one explanation for formation

78 of an ultralong DH region would be by fusion of two DH regions through deletion of intragenic sequence,  
79 with the fusion maintaining recombination signal sequences of each DH at both the 5' and 3' ends.

#### 80 *Cluster 2 has a short chromosomal rearrangement*

81 To evaluate the location of the deletion in cluster 2 relative to clusters 3 and 4, we performed a series of  
82 sequence alignments of the clusters, the DH regions, and the intergenic regions (between DH regions).  
83 Indeed, the deletion in cluster 2 in relation to clusters 3 and 4 occurred at IGHD8-2, however the  
84 deletion was also associated with a larger chromosomal rearrangement. In this regard, IGHD5-2 in  
85 cluster 2 appears to have replaced the paralog for IGHD3-3 (cluster 3) and IGHD3-4 (cluster 4)(Figure 1,  
86 Supplemental Figures 2-3). The IGHD5 homologs are immediately 5' of the IGHD6 family members in  
87 clusters 3 and 4, however IGHD5-2 is situated immediately 3' of IGHD2-2 and immediately 5' of the  
88 ultralong IGHD8-2 region in cluster 2 (Figure 1). There is no IGHD3 family member in cluster 2  
89 (Supplemental Figure 3), with the paralog of IGHD3-3 and IGHD3-4 either deleted or fused to the  
90 adjacent DH region, which would be a paralog of IGHD7-3 (cluster 3) or IGHD7-4 (cluster 4). Global  
91 alignments of the clusters show deleted nucleotides at IGHD8-2 as well as the position occupied by  
92 family 5 genes in clusters 3 and 4 (*e.g.* between IGHD7 and IGHD6). Alignments of the intergenic regions  
93 show that the intergenic region corresponding to the sequence between IGHD3-3 and IGHD7-3 in cluster  
94 3 (or IGHD3-4 and IGHD7-4 in cluster 4) is deleted in cluster 2 (Supplemental Figure 4). While IGHD5-2  
95 has been transposed to a location 3' to IGHD8-2, the actual genetic material deleted clearly includes  
96 IGHD3 and its 3' intergenic region. Thus, one possibility is that the ultralong IGHD8-2 region resulted  
97 from a deletion and associated fusion of the cluster 2 paralogs of IGHD3-3 and IGHD7-3. However, local  
98 sequence alignment reveals that the 5' end of IGHD6-3 is 91.2% identical to IGHD8-2 (89.4% for IGHD6-  
99 2) over the first 85 nucleotides, whereas IGHD3-3 (and IGHD3-4) is only 80% over the first 62 residues  
100 (Supplemental Figure 7). Of note, IGHD6 family sequences share a cysteine in the same position as the  
101 conserved cysteine in IGHD8-2, which is highly conserved in deep sequenced ultralong CDR H3  
102 antibodies, and forms a conserved disulfide bond at the base of the ultralong CDR H3 stalk [23, 26].  
103 Thus, donation of an IGHD6 to the 5' end of an IGHD7 through a recombinational or gene conversion  
104 process is a likely mechanism to produce IGHD8-2. Given the high homology of many of the DH regions  
105 and intergenic regions, we cannot definitively identify exact chromosomal breakpoints and cannot rule  
106 out that other events could have occurred in conjunction with the deletion event of the intragenic  
107 region between IGHD3 and IGHD7. For example, gene conversion could alternatively have occurred  
108 between IGHD6 and IGHD7 paralogs, or a deletion event followed by insertions of repeats into an IGHD7  
109 paralog could have occurred. However, RSS analysis indicates that the 5' RSS of IGHD8-2 shares identity  
110 with either IGHD3 or IGHD6 families (Table 1), thus a fusion between IGHD6 and IGHD7 or gene  
111 conversion of IGHD6 into IGHD3 followed by fusion to IGHD7 are likely mechanisms to produce the  
112 IGHD8-2 gene through a fusion event. The 3' RSS of IGHD8-2 is identical to IGHD7 genes, and local  
113 alignments show homology between IGHD7 and IGHD8-2, suggesting that a primordial IGHD7 paralog  
114 from cluster 2 now forms the 3' region of IGHD8-2.

#### 115 *DH genes have expanded repeats*

116 Bovine IGHD regions are comprised of multiple repeating short sequence motifs, with the major  
117 differences between several DH regions being length differences due to variable numbers of nucleotide  
118 repeats (Figure 2). IGHD7-4 is the second longest DH region, and only differs from IGHD7-3 (its paralog  
119 in cluster 3) by one repeat of TGGTTA, which results in a two amino acid change in length. IGHD7-3,

120 IGHD7-4 and IGHD8-2 (the ultralong DH region) are very similar in having several repeating units, but  
121 with IGHD8-2 being dramatically longer. The 3' ends of IGHD7-3 and IGHD7-4 are 85.6% and 77.4%  
122 identical to IGHD8-2 over the last 96 nucleotides, respectively (Supplementary Figure 5). The longer DH  
123 regions appear to be evolutionarily active in length evolution based on expanding or contracting  
124 repeats, as polymorphisms in IGHD8-2 *Bos taurus* differ in repeat lengths (Figure 2, Supplemental Figure  
125 6). In this regard, two IGHD8-2 polymorphisms have been reported that differ in length and cysteine  
126 position, but share similar repeating nucleotide and amino acid sequences[29, 30, 34]. Related species  
127 like *Bos grunniens* (domestic Yak) and *Bison bison* (American buffalo) also have ultralong CDR H3 regions  
128 encoded by IGHD8-2 orthologs, but differ in their lengths due to apparent differences in hexanucleotide  
129 repeat expansion within the coding regions (Figure 2, Supplemental Figure 6). Thus, while two DH  
130 genes may have fused to form the long IGHD8-2 gene, nucleotide repeat expansion or contraction  
131 appears to also play a role in long DH region evolution in these species. To summarize, our analysis  
132 indicates that the most likely origin of IGHD8-2 is through a fusion event comprising the 5' end of IGHD6  
133 with the 3' end of IGHD7 based on homology analysis, as well as the preservation of the codon encoding  
134 the nearly completely conserved first cysteine of the knob domain. This event, however, was associated  
135 with a larger chromosomal rearrangement that replaced an IGHD3 paralog and its 3' intergenic region in  
136 cluster 2 with IGHD5-2 (Figure 3).

137

## 138 **Conclusions and Discussion**

139 The antibody repertoire is a defining evolutionary feature of vertebrates. V(D)J recombination and its  
140 associated junctional diversity account for vast potential diversity in antibody receptors on naïve B-cells,  
141 with an ability to bind with low affinity to most antigens. Most species utilize many V, D, and J gene  
142 segments which produce a great combinatorial potential at the heavy and light chain loci. Some species,  
143 however, have fewer functional V, D, and J segments and may use additional mechanisms to add  
144 diversity to their repertoires. Cows, in particular, have few VH and DH regions, but have very long CDR  
145 H3 regions. The homologous DH regions are cysteine rich, and diversity can be generated through both  
146 germline and somatically generated cysteines, which can form a diverse array of potential disulfide  
147 bonded loops[23, 35, 36]. In the knob region of ultralong CDR H3s, a diversity of disulfide bond patterns  
148 has been observed in several crystal structures [23, 25, 26], and mutations to and from cysteine have  
149 been confirmed through deep sequence analysis. Thus, novel cysteines encoded in the DH regions  
150 contributes to structural diversity in bovine antibodies.

151 The length of the DH regions in cows contributes to the overall increase in CDR H3 lengths in the  
152 antibody heavy chain repertoire. At the extreme, IGHD8-2 encodes 49 or 51 amino acids, depending on  
153 the polymorphic variant[29, 30, 34], and enables CDR H3 lengths of up to 70 amino acids in length.  
154 These CDR H3 regions form independently folding mini-domains comprised of a  $\beta$ -ribbon “stalk” and a  
155 disulfide-bonded “knob” that project far from the antigen surface. The sequence diversity of heavy  
156 chains with ultralong CDR H3 regions is enormous [16, 23], despite the fact that only one IGHD8-2 region  
157 (albeit with two polymorphic variants) is used in this entire class of antibodies. This vast diversity is  
158 explained by the fact that cattle utilize AID mediated somatic hypermutation in the pre-immune  
159 repertoire, as opposed to after antigen exposure as in other species, and this robust mutation induction  
160 substantially diversifies the repertoire through amino acid changes, cysteine mutations to alter disulfide  
161 loops, and a substantial proportion of deletional events which can also impact loop structures[16, 21].

162 All of these diversifying events use the germline IGHD regions as a template during repertoire formation.  
163 The IGHD templates are characterized by comprising multiple AID SH “hotspots” as well as nucleotide  
164 repeats that preferentially encode Ser, Gly, Tyr, and Cys, often in several repeating units like Gly-Tyr-Gly  
165 or Gly-Tyr-Ser. Here we show that nucleotide repeating units differ between IGHD paralogs derived  
166 from different clusters, and that the unusual ultralong IGHD8-2 region likely formed from a DH-DH  
167 fusion in cluster 2 of primordial IGHD6 (or IGHD3) to IGHD7 family members. Clearly a substantial  
168 deletion event occurred in the region now encoding IGHD8-2, which can be explained by deletion of the  
169 3’ end of IGHD3, the intergenic region between IGHD3 and IGHD7, and the 5’ end of IGHD7. However,  
170 this event was also associated with a more substantial rearrangement that additionally replaced the  
171 IGHD3 paralog with IGHD5. Given that homologous variants of IGHD8-2 within *Bos taurus*, as well as in  
172 *Bos grunniens* and *Bison bison* differ in the length of IGHD8-2 through differences in the number of short  
173 repeats, it is likely that repeat expansion played a role in IGHD8-2 evolution either with a genetic fusion,  
174 or with massive expansion in the absence of the fusion of two DH regions. The ability of the genome to  
175 diversify IGHD region lengths through genomic rearrangement and repeat expansion provides a novel  
176 genetic mechanism for Darwinian diversification of the vertebrate immune system.

177

## 178 **Materials and Methods**

179 The DNA sequence encoding the bovine antibody heavy chain locus (accession no. KT723008)[29] was  
180 downloaded from the IMGT server (<http://www.imgt.org/>). Clusters 2, 3 and 4 were defined by the  
181 beginning of the Family 1 gene RSS to the end of the Family 6 gene RSS. Sequences of IGHD regions,  
182 intergenic regions, and clusters were derived using the with Bioconductor program using the R statistical  
183 program language [37]. Multiple sequence alignments were done using Clustal Omega, WebPrank, or  
184 Muscle (<https://www.ebi.ac.uk/services>). Local sequence alignments were done using Matcher  
185 (<https://www.ebi.ac.uk/Tools/psa/>). The *Bison bison* and *Bos grunniens* IGHD8-2 sequences were  
186 identified by BLAST search at the ensembl genome server ([www.ensembl.org](http://www.ensembl.org)) using the *Bos taurus*  
187 IGHD8-2 gene as query. *Bison bison* and *Bos grunniens* IGHD8-2 genes were found within the genomic  
188 sequences with accession numbers XM\_010833706.1 (Bison) and CM016710.1 (Yak).

189

## 190 **Acknowledgements**

191 This work was funded by NIH grants R01 GM105826 and R01 HD088400 to V.V.S. We are grateful for  
192 helpful conversations regarding this work with Ali Torkamani and Michael Criscitiello.

193

## 194 **Author Contributions**

195 Both authors performed bioinformatic analysis and made the figures. V.V.S. wrote the manuscript with  
196 input from B.A.S.

197

198

## 199 **Figures and Tables**

200 **Table 1.** Recombination signal sequences of DH regions from clusters 2, 3 and 4.

201 **Figure 1.** Schematic of D region clusters at the *Bos taurus* immunoglobulin heavy chain locus. (A) D-  
202 region cluster 2, comprising an ultralong IGHD, is shorter than highly homologous clusters. The DH  
203 regions are organized in four clusters at the immunoglobulin heavy chain locus on *Bos taurus*  
204 chromosome 21. Three clusters are highly homologous (clusters 2, 3 and 4 which are boxed). Green  
205 rectangles represent DH regions; orange, JH regions; blue, CH regions; light blue, pseudogene CH  
206 regions; and light pink, pseudogene VH regions. The entire locus is not shown; VH regions are upstream  
207 and remaining constant regions are downstream of the region shown. (B) Cluster 2 has a deletion and  
208 rearrangement in relation to clusters 3 and 4. Aligned schematic of the DH regions and their locations  
209 within the clusters. The numbers inside the boxes indicate the family members of each DH (e.g. on the  
210 first line, "1" represents IGHD1-2, and "1" on the second line represents IGHD1-3, etc.). IGHD5 is  
211 labeled in red to illustrate its unusual location in cluster 2 relative to clusters 3 and 4. The ultralong DH,  
212 IGHD8-2, is outlined in green. The transparent grey box encompassing IGHD3 and IGHD7 regions  
213 represents the approximate region of a large nucleotide deletion in cluster 2 relative to clusters 3 and 4.  
214 Triangles represent the recombination signal sequences (RSS) containing heptamer, 12 basepair spacer,  
215 and nonamer regions.

216 **Figure 2.** Bovine DH regions are characterized by repetitive sequences. (A) Nucleotide sequences of  
217 bovine DH regions in clusters 2-4. The RSS are in lowercase letters with the heptamer and nonamers in  
218 italics and underlined. The coding region of each DH is uppercase. Repeated sequences are colored red,  
219 blue and green. (B) Ungulate ultralong DH regions have different repeat lengths. The nucleotide  
220 sequences of polymorphic variants IGHD8-2\*01 and IGHD8-2\*02 for *Bos taurus* are compared to  
221 domestic yak (*Bos grunniens*; BosGru) and American bison (*Bison bison*; bison) orthologs of IGHD8-2.

222 **Figure 3.** Model of deletion, fusion, and repeat expansion to form the ultralong DH region in cluster 2.  
223 Highly homologous sequences in clusters could misalign where IGHD5 and 6 pair with IGHD3 and 7  
224 during replication processes. IGHD3 and its 3' intergenic sequence is deleted (transparent grey  
225 rectangle). The short nucleotide repeats found in IGHD6 and 7 could cause mispairing and fusion,  
226 creating a fused DH-DH region of IGHD6 and IGHD7. A gene conversion or duplication event of IGHD6  
227 would be required under this scenario. Continued repeat expansion produces IGHD8-2 homologs (red  
228 arrow). "pCluster" denotes a hypothetical precursor cluster in evolution.

229

230 **Supplemental Figure 1.** Alignment of *Bos taurus* DH regions.

231 **Supplemental Figure 2.** Alignment of DH clusters 2, 3, and 4.

232 **Supplemental Figure 3.** Phylogenetic of DH paralogs from clusters 2 and 3.

233 **Supplemental Figure 4.** Phylogenetic analysis of intergenic regions from clusters 2 and 3.

234 **Supplemental Figure 5.** Alignment of IGHD7 family members with IGHD8-2.

235 **Supplemental Figure 6.** Identification ultralong IGHD region homologs in *Bos taurus*, *Bos grunniens* and  
236 *Bison bison*.

237 **Supplemental Figure 7.** Alignment of IGHD3 and IGHD6 family members with IGHD8-2.

238 **Supplemental Figure 8.** Fusion analysis of IGHD members to form IGHD8-2 homologs.

239

## 240 **References**

- 241 1. Fugmann SD, Lee AI, Shockett PE, Villey IJ, Schatz DG: **The RAG proteins and V(D)J**  
242 **recombination: complexes, ends, and transposition.** *Annu Rev Immunol* 2000, **18**:495-527.
- 243 2. Smider V, Chu G: **The end-joining reaction in V(D)J recombination.** *Semin Immunol* 1997,  
244 **9(3)**:189-197.
- 245 3. Tonegawa S: **Somatic generation of antibody diversity.** *Nature* 1983, **302**:575-581.
- 246 4. Burton DR, Hangartner L: **Broadly Neutralizing Antibodies to HIV and Their Role in Vaccine**  
247 **Design.** *Annu Rev Immunol* 2016, **34(1)**:635-659.
- 248 5. Burton DR, Poignard P, Stanfield RL, Wilson IA: **Broadly neutralizing antibodies present new**  
249 **prospects to counter highly antigenically diverse viruses.** *Science* 2012, **337(6091)**:183-186.
- 250 6. Kwong PD, Wilson IA: **HIV-1 and influenza antibodies: seeing antigens in new ways.** *Nat*  
251 *Immunol* 2009, **10(6)**:573-578.
- 252 7. Puligedda RD, Kouivaskaia D, Al-Saleem FH, Kattala CD, Nabi U, Yaqoob H, Bhagavathula VS,  
253 Sharma R, Chumakov K, Dessain SK: **Characterization of human monoclonal antibodies that**  
254 **neutralize multiple poliovirus serotypes.** *Vaccine* 2017, **35(41)**:5455-5462.
- 255 8. Stanfield RL, Wilson IA: **Antibody Structure.** *Microbiol Spectr* 2014, **2(2)**.
- 256 9. Douthwaite JA, Sridharan S, Huntington C, Hammersley J, Marwood R, Hakulinen JK, Ek M,  
257 Sjogren T, Rider D, Privezentzev C *et al*: **Affinity maturation of a novel antagonistic human**  
258 **monoclonal antibody with a long VH CDR3 targeting the Class A GPCR formyl-peptide receptor**  
259 **1.** *MAbs* 2015, **7(1)**:152-166.
- 260 10. Nam DH, Rodriguez C, Remacle AG, Strongin AY, Ge X: **Active-site MMP-selective antibody**  
261 **inhibitors discovered from convex paratope synthetic libraries.** *Proc Natl Acad Sci U S A* 2016,  
262 **113(52)**:14970-14975.
- 263 11. Bonsignori M, Hwang KK, Chen X, Tsao CY, Morris L, Gray E, Marshall DJ, Crump JA, Kapiga SH,  
264 Sam NE *et al*: **Analysis of a clonal lineage of HIV-1 envelope V2/V3 conformational epitope-**  
265 **specific broadly neutralizing antibodies and their inferred unmutated common ancestors.** *J*  
266 *Virol* 2011, **85(19)**:9998-10009.
- 267 12. Doria-Rose NA, Schramm CA, Gorman J, Moore PL, Bhiman JN, DeKosky BJ, Ernandes MJ,  
268 Georgiev IS, Kim HJ, Pancera M *et al*: **Developmental pathway for potent V1V2-directed HIV-**  
269 **neutralizing antibodies.** *Nature* 2014, **509(7498)**:55-62.
- 270 13. Walker LM, Huber M, Doores KJ, Falkowska E, Pejchal R, Julien JP, Wang SK, Ramos A, Chan-Hui  
271 PY, Moyle M *et al*: **Broad neutralization coverage of HIV by multiple highly potent antibodies.**  
272 *Nature* 2011, **477(7365)**:466-470.
- 273 14. Berens SJ, Wylie DE, Lopez OJ: **Use of a single VH family and long CDR3s in the variable region**  
274 **of cattle Ig heavy chains.** *Int Immunol* 1997, **9(1)**:189-199.
- 275 15. de los Rios M, Criscitiello MF, Smider VV: **Structural and genetic diversity in antibody**  
276 **repertoires from diverse species.** *Curr Opin Struct Biol* 2015, **33**:27-41.

- 277 16. Deiss TC, Vadnais M, Wang F, Chen PL, Torkamani A, Mwangi W, Lefranc M-P, Criscitiello MF,  
278 Smider VV: **Immunogenetic factors driving formation of ultralong VH CDR3 in Bos taurus**  
279 **antibodies.** *Cell Mol Immunol* 2017, **14**:1-12.
- 280 17. Lopez O, Perez C, Wylie D: **A single VH family and long CDR3s are the targets for**  
281 **hypermutation in bovine immunoglobulin heavy chains.** *Immunol Rev* 1998, **162**:55-66.
- 282 18. Saini SS, Allore B, Jacobs RM, Kaushik A: **Exceptionally long CDR3H region with multiple**  
283 **cysteine residues in functional bovine IgM antibodies.** *Eur J Immunol* 1999, **29**(8):2420-2426.
- 284 19. Saini SS, Farrugia W, Ramsland PA, Kaushik AK: **Bovine IgM antibodies with exceptionally long**  
285 **complementarity-determining region 3 of the heavy chain share unique structural properties**  
286 **conferring restricted VH + Vlambda pairings.** *Int Immunol* 2003, **15**(7):845-853.
- 287 20. Saini SS, Kaushik A: **Extensive CDR3H length heterogeneity exists in bovine foetal VDJ**  
288 **rearrangements.** *Scand J Immunol* 2002, **55**(2):140-148.
- 289 21. Stanfield RL, Haakenson J, Deiss TC, Criscitiello MF, Wilson IA, Smider VV: **The Unusual Genetics**  
290 **and Biochemistry of Bovine Immunoglobulins.** *Adv Immunol* 2018, **137**:135-164.
- 291 22. Walther S, Czerny C-P, Diesterbeck US: **Exceptionally long CDR3H are not isotype restricted in**  
292 **bovine immunoglobulins.** *PLoS One* 2013, **8**(5):e64234.
- 293 23. Wang F, Ekiert DC, Ahmad I, Yu W, Zhang Y, Bazirgan O, Torkamani A, Raudsepp T, Mwangi W,  
294 Criscitiello MF *et al*: **Reshaping antibody diversity.** *Cell* 2013, **153**(6):1379-1393.
- 295 24. Zhao Y, Jackson SM, Aitken R: **The bovine antibody repertoire.** *Dev Comp Immunol* 2006, **30**(1-  
296 2):175-186.
- 297 25. Dong J, Finn JA, Larsen PA, Smith TPL, Crowe JE, Jr.: **Structural Diversity of Ultralong CDRH3s in**  
298 **Seven Bovine Antibody Heavy Chains.** *Front Immunol* 2019, **10**:558.
- 299 26. Stanfield RL, Wilson IA, Smider VV: **Conservation and diversity in the ultralong third heavy-**  
300 **chain complementarity-determining region of bovine antibodies.** *Sci Immunol* 2016,  
301 **1**(1):aaf7962.
- 302 27. Sok D, Le KM, Vadnais M, Saye-Francisco KL, Jardine JG, Torres JL, Berndsen ZT, Kong L, Stanfield  
303 R, Ruiz J *et al*: **Rapid elicitation of broadly neutralizing antibodies to HIV by immunization in**  
304 **cows.** *Nature* 2017, **548**(7665):108-111.
- 305 28. Koti M, Kataeva G, Kaushik A: **Organization of DH-gene locus is distinct in cattle.** *Dev Biol* 2008,  
306 **132**:307-313.
- 307 29. Ma L, Qin T, Chu D, Cheng X, Wang J, Wang X, Wang P, Han H, Ren L, Aitken R *et al*: **Internal**  
308 **Duplications of DH, JH, and C Region Genes Create an Unusual IgH Gene Locus in Cattle.** *J*  
309 *Immunol* 2016, **196**(10):4358-4366.
- 310 30. Shojaei F, Saini SS, Kaushik AK: **Unusually long germline DH genes contribute to large sized**  
311 **CDR3H in bovine antibodies.** *Mol Immunol* 2003, **40**(1):61-67.
- 312 31. Lefranc MP: **Immunoglobulin and T Cell Receptor Genes: IMGT((R)) and the Birth and Rise of**  
313 **Immunoinformatics.** *Front Immunol* 2014, **5**:22.
- 314 32. Lefranc MP, Pommie C, Ruiz M, Giudicelli V, Foulquier E, Truong L, Thouvenin-Contet V, Lefranc  
315 G: **IMGT unique numbering for immunoglobulin and T cell receptor variable domains and Ig**  
316 **superfamily V-like domains.** *Dev Comp Immunol* 2003, **27**(1):55-77.



- 317 33. Lefranc M-P, Lefranc G: **The Immunoglobulin FactsBook**. London, UK: Academic Press; 2001.
- 318 34. Liljavirta J, Niku M, Pessa-Morikawa T, Ekman A, Iivanainen A: **Expansion of the preimmune**  
319 **antibody repertoire by junctional diversity in *Bos taurus***. *PLoS One* 2014, **9**(6):e99808.
- 320 35. Haakenson JK, Deiss TC, Warner GF, Mwangi W, Criscitiello MF, Smider VV: **A broad role for**  
321 **cysteines in bovine antibody diversity**. *Immunohorizons* 2019, **in press**.
- 322 36. Haakenson JK, Huang R, Smider VV: **Diversity in the Cow Ultralong CDR H3 Antibody**  
323 **Repertoire**. *Front Immunol* 2018, **9**:1262.
- 324 37. Gentleman RC, Carey VJ, Bates DM, Bolstad B, Dettling M, Dudoit S, Ellis B, Gautier L, Ge Y,  
325 Gentry J *et al*: **Bioconductor: open software development for computational biology and**  
326 **bioinformatics**. *Genome Biol* 2004, **5**(10):R80.
- 327

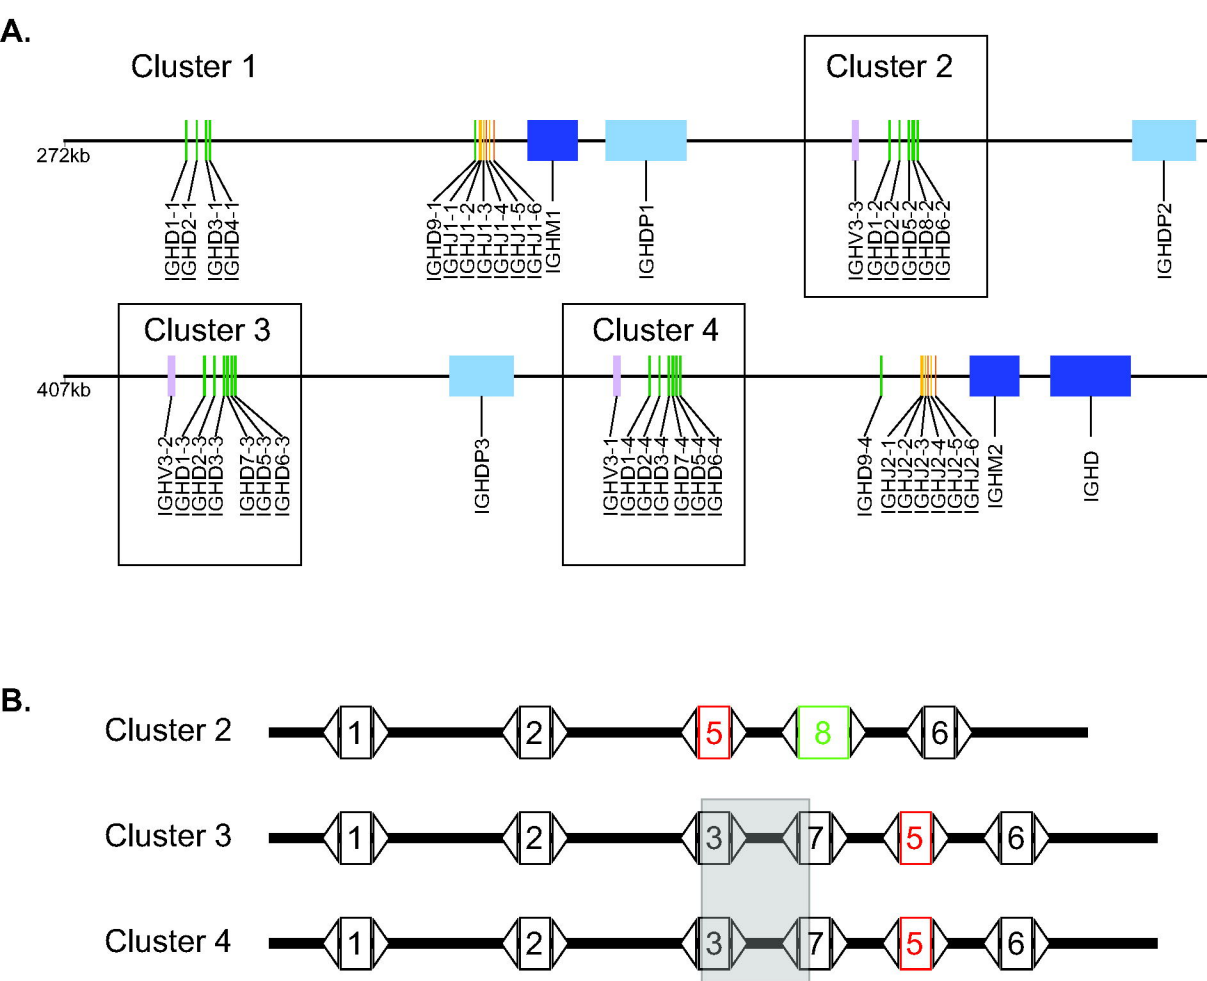

Figure 1



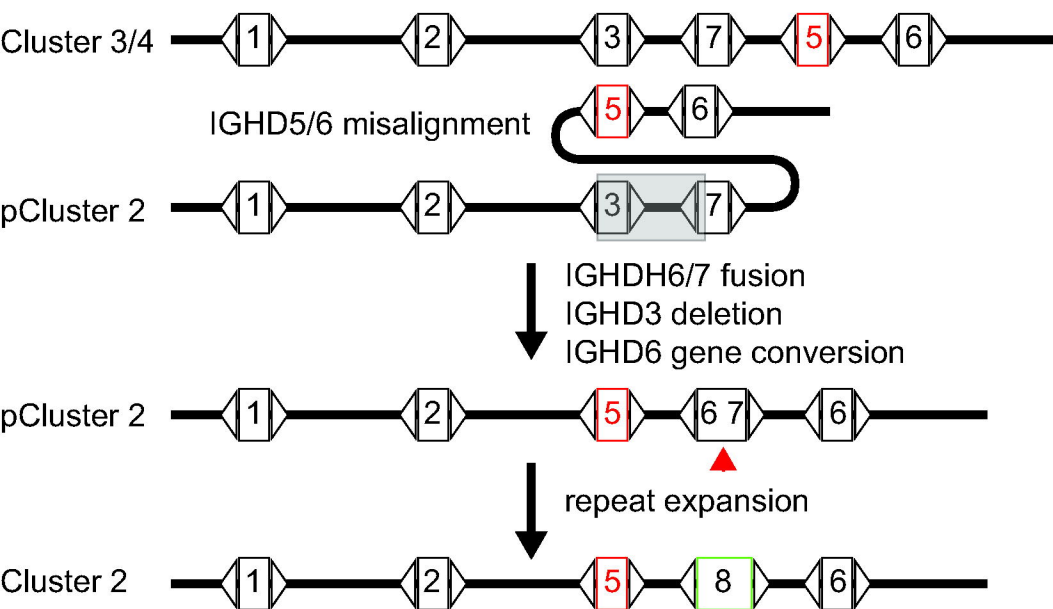

Figure 3

**Table 1.** Recombination signal sequences (RSS) of *Bos Taurus* IGHD regions from clusters 2-4.

| 5' RSS<br>(heptamer spacer nonamer)             | IGHD    | Cluster  | 3' RSS<br>(heptamer spacer nonamer)           |
|-------------------------------------------------|---------|----------|-----------------------------------------------|
| <u>ggat</u> tttga ggtgtgcgtgt <u>cacc</u> ctg   | IGHD1-2 | <b>2</b> | <u>cacagt</u> actcaggccctg <u>acataaa</u> agt |
| <u>ggat</u> tttga ggtgtgcgtgt <u>cacc</u> ctg   | IGHD1-3 | <b>3</b> | <u>cacagt</u> actcaggccctg <u>acataaa</u> agt |
| <u>ggat</u> tttga ggtgtgcgtgt <u>cacc</u> ctg   | IGHD1-4 | <b>4</b> | <u>cacagt</u> actcaggccctg <u>acataaa</u> agt |
| <u>gct</u> ttttgc caagggctctac <u>tgc</u> ggtg  | IGHD2-2 | <b>2</b> | <u>cacagt</u> agacatggggca <u>gcaaacc</u> ct  |
| <u>gct</u> ttttgc caagggctctac <u>tgc</u> ggtg  | IGHD2-3 | <b>3</b> | <u>cacagt</u> agacatggggca <u>gcaaacc</u> ct  |
| <u>gct</u> ttttgc caagggctctac <u>tgc</u> ggtg  | IGHD2-4 | <b>4</b> | <u>cacagt</u> agacatggggca <u>gcaaacc</u> ct  |
| <u>ggt</u> tttctga tgccggctgtgt <u>cac</u> ggtg | IGHD3-3 | <b>3</b> | <u>cacagt</u> aactgtccagg <u>acagaaa</u> acc  |
| <u>ggt</u> tttctga tgccggctgtgt <u>cac</u> ggtg | IGHD3-4 | <b>4</b> | <u>cacagt</u> aactgtccagg <u>acagaaa</u> acc  |
| <u>ggt</u> tttctga tgccggctgtgt <u>cac</u> ggtg | IGHD7-3 | <b>3</b> | <u>cacagt</u> atactctctggg <u>acaaaaa</u> acc |
| <u>ggt</u> tttctga tgccggctgtgt <u>cac</u> ggtg | IGHD7-4 | <b>4</b> | <u>cacagt</u> atactctctggg <u>acaaaaa</u> acc |
| <u>ggt</u> tttctga tgccggctgtgt <u>cac</u> ggtg | IGHD8-2 | <b>2</b> | <u>cacagt</u> atactctctggg <u>acaaaaa</u> acc |
| <u>ggt</u> tttctga tgccggctgtgt <u>tgt</u> ggtg | IGHD5-2 | <b>2</b> | <u>cacagt</u> atgctctcagtg <u>tcagaaa</u> acc |
| <u>ggt</u> tttctga tgccggctgtgt <u>tgt</u> ggtg | IGHD5-3 | <b>3</b> | <u>cacagt</u> acgctctcagtg <u>tcagaaa</u> acc |
| <u>ggt</u> tttctga tgccggctgtgt <u>tgt</u> ggtg | IGHD5-4 | <b>4</b> | <u>cacagt</u> acgctctcagtg <u>tcagaaa</u> acc |
| <u>ggt</u> tttctga tgccggctgtgt <u>cac</u> ggtg | IGHD6-2 | <b>2</b> | <u>cacagt</u> aactctctggg <u>acaaaaa</u> acc  |
| <u>ggt</u> tttctga tgccagctgtgt <u>cac</u> ggtg | IGHD6-3 | <b>3</b> | <u>cacagt</u> aactctctggg <u>acaaaaa</u> acc  |
| <u>ggt</u> tttctga tgccagctgtgt <u>cac</u> ggtg | IGHD6-4 | <b>4</b> | <u>cacagt</u> aactctctggg <u>acaaaaa</u> acc  |
